# Supplementary material for: Highly ordered mesoporous CdxZn1−xSe ternary compound semiconductors with controlled band gap energies
Source: Royal Society of Chemistry journal article supplement (doi:10.1039/c4nj00626g), 2014-01-01
Supplement: c4nj00626g1.pdf [file c4nj00626g1.pdf]

Electronic Supplementary Information (ESI) for New Journal of Chemistry

This journal is © The Royal Society of Chemistry 2014

## **Highly ordered mesoporous Cd<sub>x</sub>Zn<sub>1-x</sub>Se ternary compound semiconductors with controlled band gap energies**

Yoon Yun Lee,<sup>a</sup> Jeong Kuk Shon,<sup>b,‡,\*</sup> Suyeon Bae,<sup>c</sup> Xing Jin,<sup>b</sup> Yeong Jin Choi,<sup>b,d</sup> Sun Sang  
Kwon,<sup>b</sup> Tae Hee Han,<sup>e</sup> and Ji Man Kim<sup>a,b,c,\*</sup>

<sup>a</sup> *SKKU Advanced Institute of Nanotechnology (SAINT), Sungkyunkwan University, Suwon  
440-746, Republic of Korea*

<sup>b</sup> *Department of Chemistry, Sungkyunkwan University, Suwon 440-746, Republic of Korea*

<sup>c</sup> *Department of Energy Science, Sungkyunkwan University, Suwon 440-746, Republic of  
Korea*

<sup>d</sup> *Amorepacific R&D Center, Yongin 446-729, Republic of Korea*

<sup>e</sup> *Department of Semiconductor Systems Engineering, School of Information and  
Communication Engineering, Sungkyunkwan University, Suwon, 440-746, Republic of Korea*

<sup>‡</sup> *Present address: Energy Lab., Samsung Advanced Institute of Technology (SAIT), Samsung  
Electronics Co., Ltd., P.O. Box 111, Suwon 440-600, Republic of Korea*

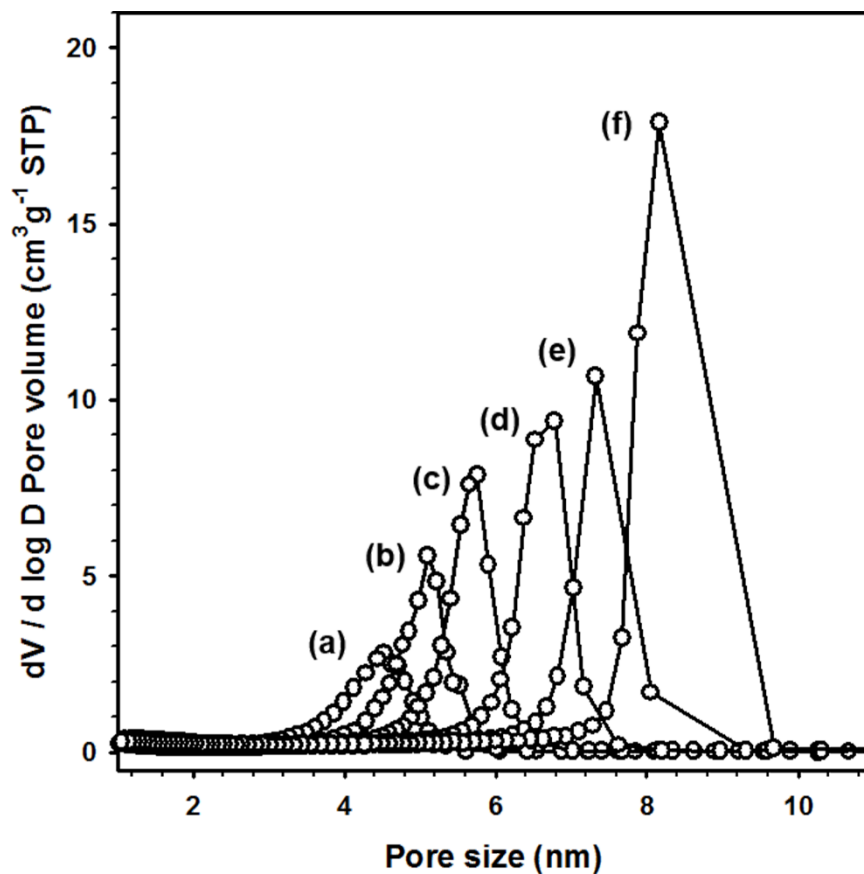

**Figure S1.** BJH pore size distributions of the KIT-6-*t* silica templates where hydrothermal temperature *t* is equal to (a) 40 °C ( $D_p = 4.5$  nm), (b) 60 °C (5.1nm), (c) 80 °C (5.8 nm), (d) 100 °C (6.8 nm), (e) 120 °C (7.3 nm), and (f) 140 °C (8.2 nm), respectively.

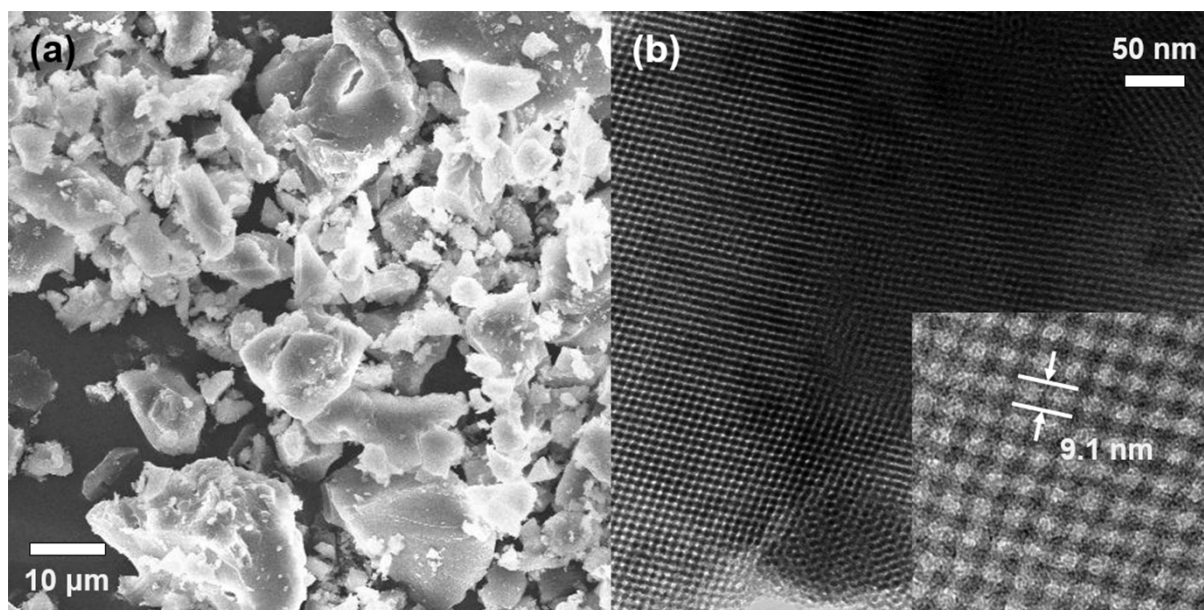

**Figure S2.** (a) SEM and (b) TEM images of the KIT-6-100 sample.

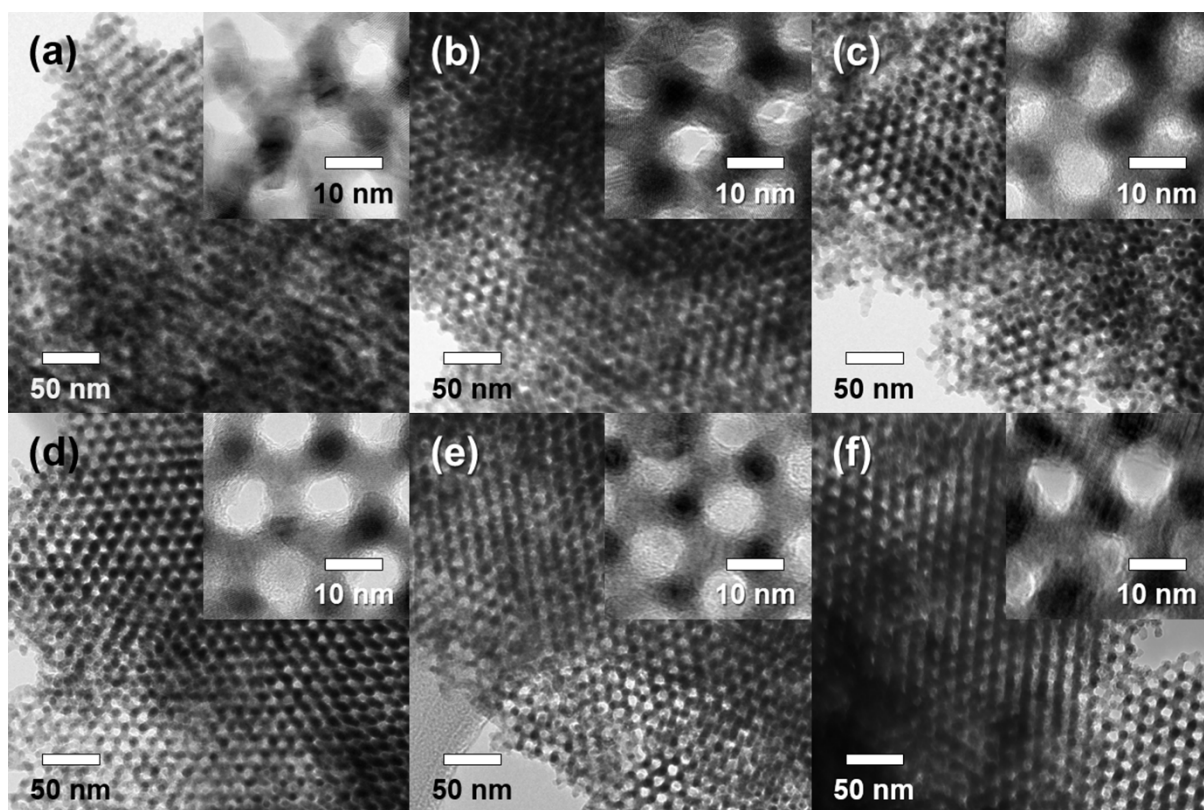

**Figure S3.** TEM images of the ordered mesoporous CZS-100- $x$  materials where  $x$  is equal to (a) 1.0 (CdSe), (b) 0.9, (c) 0.7, (d) 0.3, (e) 0.1, and (f) 0.0 (ZnSe), respectively. Insets are the HR-TEM images.

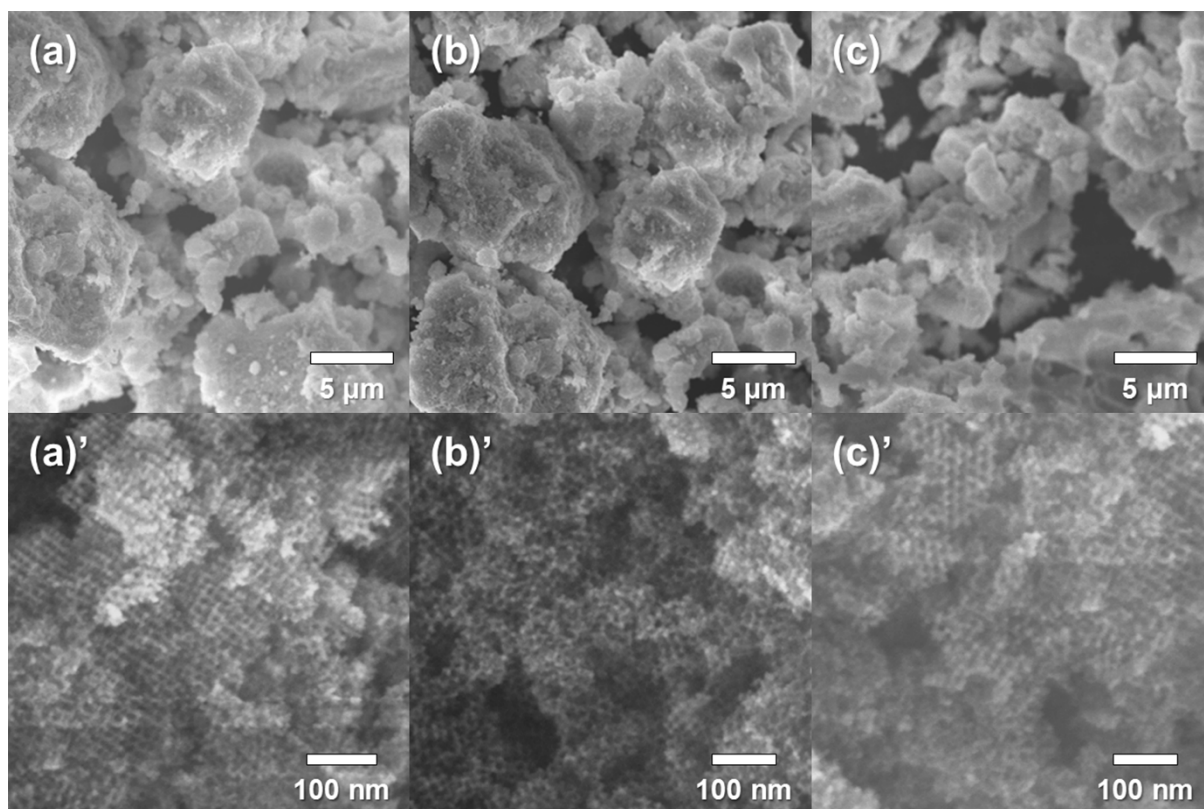

**Figure S4.** Low (upper) and high (lower) magnification SEM images of the replicated template-free mesoporous CZS-100- $x$  materials where  $x$  is equal to (a) 1.0 (CdSe), (b) 0.5, and (c) 0.0 (ZnSe), respectively.
